# Supplementary material for: Crystal structure determination, spectroscopic characterization and biological profile of a tailored ionic molecular entity, Sn(iv) iminodiacetic acid–piperazinediium conjugate: in vitro DNA/RNA binding studies, Topo I inhibition activity, cytotoxic and systemic toxicity studies
Source: Royal Society of Chemistry journal article supplement (doi:10.1039/c4ra13718c), 2015-01-01
Supplement: c4ra13718c1.pdf [file c4ra13718c1.pdf]

## Supplementary Information

**Crystal structure determination, spectroscopic characterization and biological profile of tailored ionic molecular entity, Sn(IV) iminodiacetic acid–piperazinedium conjugate: *In vitro* DNA/RNA binding studies, Topo I inhibition activity, cytotoxic and systemic toxicity studies**

Farukh Arjmand,<sup>\*a</sup> Imtiyaz Yousuf,<sup>a</sup> Yusra Zaidi<sup>b</sup> and Loic Toupet<sup>c</sup>

<sup>a</sup>Department of Chemistry, Aligarh Muslim University, Aligarh 202002, Uttar Pradesh, India

<sup>b</sup>Department of Zoology, Aligarh Muslim University, Aligarh 202002, U.P., India

<sup>c</sup>Institut de Physique de Rennes, UMR 625, Université de Rennes 1, Campus de Beaulieu Bat. 11 A, 263 av. Général Leclerc, 35042 Rennes Cedex, France

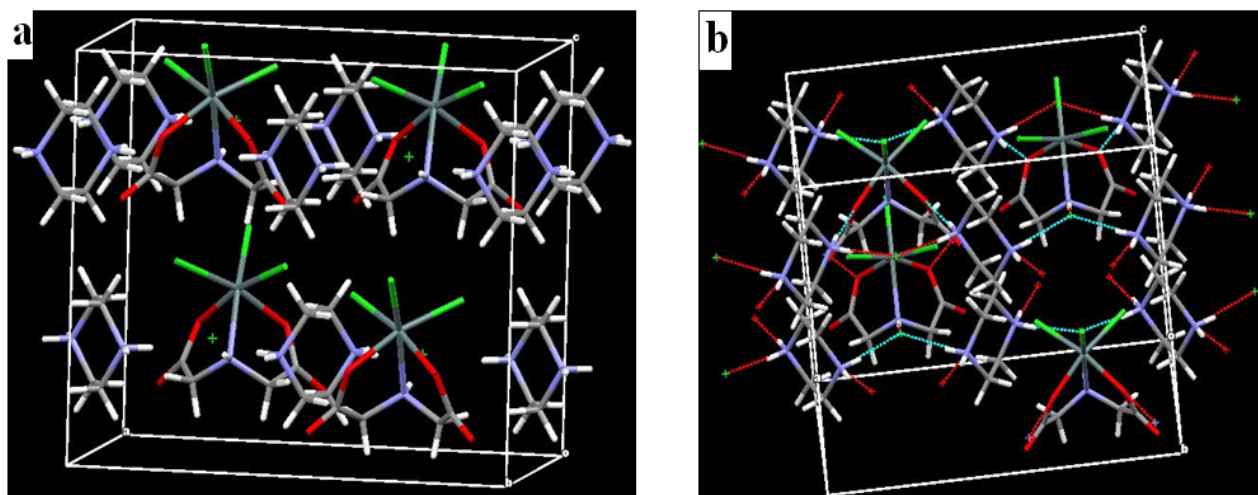

**Fig. S1.** Packing diagram of the complex 1, (a) without hydrogen bonding interactions and (b) with hydrogen bonding interactions.

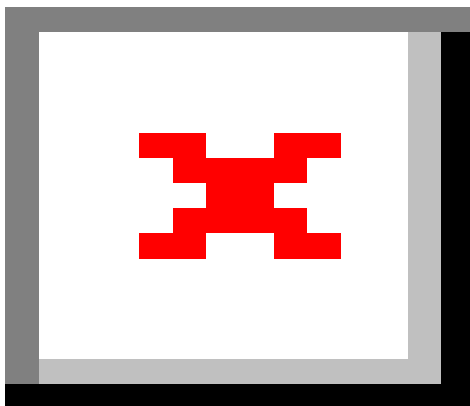

**Fig. S2.**  $^{119}\text{Sn}$  NMR spectra of complex 1

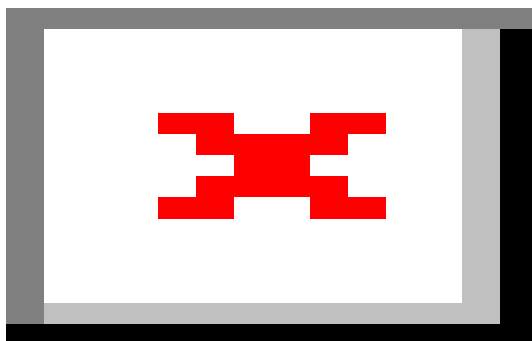

**Fig. S3.** Electrospray Ionization (ESI) mass spectrum of 1.

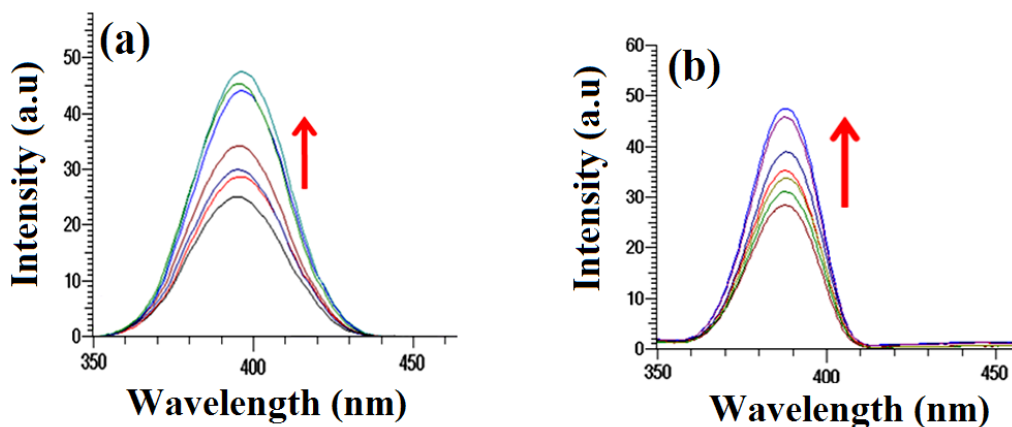

**Fig. S4.** Emission spectra of complex **1** in Tris-HCl buffer at pH 7.2 upon addition (a) ct-DNA and (b) yeast tRNA.  $[DNA], [RNA] = 0.00\text{--}4.00 \times 10^{-5} \text{ M}$ ,  $[Complex \mathbf{1}] = 1.67 \times 10^{-5} \text{ M}$  at 25 °C. Arrows show change in intensity with increasing concentration of DNA/RNA.

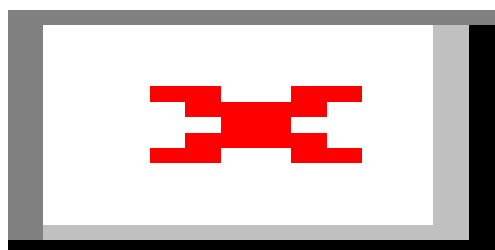

**Fig. S5.** CD spectra of (a) ct-DNA in absence and presence of **1** and (b) yeast tRNA in absence and presence of **1**.  $[Complex \mathbf{1}] = [DNA] = [RNA] = 10^{-4} \text{ M}$ .

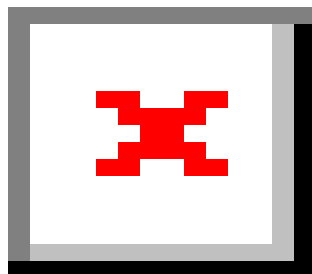

**Fig. S6.** Effect of increasing amount of **1** (red) and EB (green) on the relative viscosities ( $\eta/\eta_0$ ) of ct-DNA in Tris-HCl buffer at pH 7.2. The concentration of ct-DNA was 0.10 mM, and the molar ratios of complex **1** or EB to DNA were 0.2, 0.4, 0.6, 0.8 and 1.0, respectively.

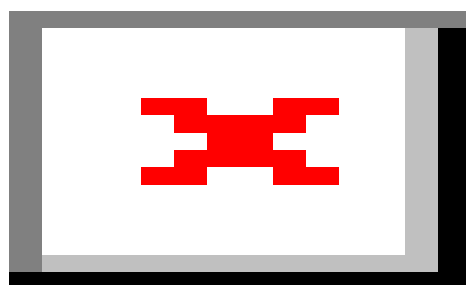

**Fig. S7.** FT-IR spectra and difference spectra [(ct-DNA/tRNA + **1**) solution-**1** solution] in the region of 1800-800  $\text{cm}^{-1}$  for (a) free ct-DNA and in presence of **1** (b) free yeast tRNA and in presence of **1**.

**Tables:****Table S1.** Selected bond lengths (Å) and angles (°) for complex **1**.

| <b>Bond lengths</b> | <b>(Å)</b> |
|---------------------|------------|
| Sn(1) – Cl(1)       | 2.367 (8)  |
| Sn(1) – Cl(2)       | 2.351 (1)  |
| Sn(1) – O(1)        | 2.089 (2)  |
| Sn(1) – N(1)        | 2.221 (3)  |
| O(1) – C(2)         | 1.303 (3)  |
| O(2) – C(2)         | 1.203 (3)  |
| N(1) – C(1)         | 1.484 (4)  |
| N(2) – C(3)         | 1.464 (5)  |
| N(2) – C(4)         | 1.478 (3)  |
| N(2)–H(2A)          | 0.920(2)   |
| N(2)–H(2B)          | 0.921(2)   |

| <b>Bond Angles</b> | <b>(°)</b> |
|--------------------|------------|
| Cl1–Sn1–Cl2        | 99.73(3)   |
| Cl1–Sn1–O1         | 89.56(6)   |
| Cl1–Sn1–N1         | 91.07(9)   |
| Cl1–Sn1–O1         | 168.43(6)  |
| Cl1–Sn1–Cl1        | 95.30(3)   |
| Cl2–Sn1–O1         | 89.74(6)   |
| Cl2–Sn1–N1         | 163.88(9)  |
| Cl2–Sn1–O1         | 89.74(6)   |
| Cl2–Sn1–Cl1        | 99.73(3)   |
| Sn1–O1–C2          | 118.9(2)   |
| O1–Sn1–N1          | 78.3(1)    |
| O1–Sn1–O1          | 83.82(7)   |
| N1–Sn1–O1          | 78.3(1)    |
| N1–Sn1–Cl1         | 91.07(9)   |
| O1–Sn1–Cl1         | 89.56(6)   |
| Sn1–N1–C1          | 108.0(2)   |
| O1–C2–C1           | 116.4(2)   |
| O2–C2–C1           | 120.6(3)   |
| Sn1–O1–C2          | 118.9(2)   |

**Table S2.** % Control growth against different concentration ( $\mu\text{g/ml}$ ) of **1** and ADR of various human carcinoma cell lines: U373MG (CNS), PC3 (Prostate), Hop62 (Lung), HL60 (Leukemia), HCT15 (Colon), SK-OV-3 (Ovarian), HeLa (Cervix) and MCF7 (breast).

| Human CNS Cancer Cell Line U373MG        |      |      |      |              |      |      |      |              |      |      |      |                |      |      |      |      |
|------------------------------------------|------|------|------|--------------|------|------|------|--------------|------|------|------|----------------|------|------|------|------|
| % Control Growth                         |      |      |      |              |      |      |      |              |      |      |      |                |      |      |      |      |
| Drug Concentrations ( $\mu\text{g/ml}$ ) |      |      |      |              |      |      |      |              |      |      |      |                |      |      |      |      |
| Experiment 1                             |      |      |      | Experiment 2 |      |      |      | Experiment 3 |      |      |      | Average Values |      |      |      |      |
|                                          | 10   | 20   | 40   | 80           | 10   | 20   | 40   | 80           | 10   | 20   | 40   | 80             | 10   | 20   | 40   | 80   |
| <b>Complex 1</b>                         | 82.8 | 81.4 | 49.0 | 44.1         | 86.3 | 41.7 | 37.9 | 35.1         | 83.5 | 40.3 | 34.0 | 33.3           | 84.2 | 54.5 | 40.3 | 37.5 |
| <b>ADR</b>                               | 75.9 | 57.7 | 50.4 | 32.6         | 82.1 | 58.1 | 56.3 | 44.8         | 58.8 | 56.7 | 54.2 | 36.1           | 72.3 | 57.5 | 53.7 | 37.9 |

| Human Prostate Cancer Cell Line PC3      |       |       |       |              |       |       |       |              |       |       |       |                |       |       |       |       |
|------------------------------------------|-------|-------|-------|--------------|-------|-------|-------|--------------|-------|-------|-------|----------------|-------|-------|-------|-------|
| % Control Growth                         |       |       |       |              |       |       |       |              |       |       |       |                |       |       |       |       |
| Drug Concentrations ( $\mu\text{g/ml}$ ) |       |       |       |              |       |       |       |              |       |       |       |                |       |       |       |       |
| Experiment 1                             |       |       |       | Experiment 2 |       |       |       | Experiment 3 |       |       |       | Average Values |       |       |       |       |
|                                          | 10    | 20    | 40    | 80           | 10    | 20    | 40    | 80           | 10    | 20    | 40    | 80             | 10    | 20    | 40    | 80    |
| <b>Complex 1</b>                         | -33.0 | -35.3 | -37.4 | -42.5        | -35.0 | -43.0 | -44.0 | -45.9        | -56.8 | -56.7 | -59.3 | -62.2          | -41.6 | -45.0 | -46.9 | -50.2 |
| <b>ADR</b>                               | -30.7 | -35.1 | -36.8 | -39.0        | -51.2 | -61.1 | -63.6 | -66.4        | -59.6 | -63.0 | -67.2 | -68.6          | -47.2 | -53.1 | -55.9 | -58.0 |

| Human Lung Cancer Cell Line Hop62        |       |       |       |              |       |       |       |              |       |       |       |                |       |       |       |       |
|------------------------------------------|-------|-------|-------|--------------|-------|-------|-------|--------------|-------|-------|-------|----------------|-------|-------|-------|-------|
| % Control Growth                         |       |       |       |              |       |       |       |              |       |       |       |                |       |       |       |       |
| Drug Concentrations ( $\mu\text{g/ml}$ ) |       |       |       |              |       |       |       |              |       |       |       |                |       |       |       |       |
| Experiment 1                             |       |       |       | Experiment 2 |       |       |       | Experiment 3 |       |       |       | Average Values |       |       |       |       |
|                                          | 10    | 20    | 40    | 80           | 10    | 20    | 40    | 80           | 10    | 20    | 40    | 80             | 10    | 20    | 40    | 80    |
| <b>Complex 1</b>                         | -81.1 | -81.6 | -82.6 | -77.5        | -81.5 | -86.5 | -86.6 | -87.8        | -81.4 | -84.4 | -84.7 | -85.3          | -81.3 | -84.2 | -84.6 | -83.5 |
| <b>ADR</b>                               | -3.7  | -13.7 | -53.2 | -65.1        | -28.2 | -35.9 | -62.5 | -72.8        | -25.8 | -28.8 | -57.8 | -69.4          | -19.2 | -26.1 | -57.8 | -69.1 |

| Human Leukemia Cell Line HL60            |       |       |       |              |       |       |       |              |       |       |       |                |       |       |       |       |
|------------------------------------------|-------|-------|-------|--------------|-------|-------|-------|--------------|-------|-------|-------|----------------|-------|-------|-------|-------|
| % Control Growth                         |       |       |       |              |       |       |       |              |       |       |       |                |       |       |       |       |
| Drug Concentrations ( $\mu\text{g/ml}$ ) |       |       |       |              |       |       |       |              |       |       |       |                |       |       |       |       |
| Experiment 1                             |       |       |       | Experiment 2 |       |       |       | Experiment 3 |       |       |       | Average Values |       |       |       |       |
|                                          | 10    | 20    | 40    | 80           | 10    | 20    | 40    | 80           | 10    | 20    | 40    | 80             | 10    | 20    | 40    | 80    |
| <b>Complex 1</b>                         | -22.3 | -22.8 | -27.3 | -32.7        | -26.9 | -33.5 | -34.0 | -47.5        | -28.4 | -33.3 | -40.4 | -46.0          | -25.9 | -29.9 | -33.9 | -42.1 |
| <b>ADR</b>                               | -8.2  | -16.7 | -27.9 | -36.0        | -13.5 | -26.8 | -27.5 | -34.2        | -13.1 | -18.2 | -28.8 | -34.2          | -11.6 | -20.6 | -28.1 | -34.8 |

| Human Colon Cancer Cell Line HCT15       |       |       |       |              |       |       |       |              |       |       |       |                |       |       |       |       |
|------------------------------------------|-------|-------|-------|--------------|-------|-------|-------|--------------|-------|-------|-------|----------------|-------|-------|-------|-------|
| % Control Growth                         |       |       |       |              |       |       |       |              |       |       |       |                |       |       |       |       |
| Drug Concentrations ( $\mu\text{g/ml}$ ) |       |       |       |              |       |       |       |              |       |       |       |                |       |       |       |       |
| Experiment 1                             |       |       |       | Experiment 2 |       |       |       | Experiment 3 |       |       |       | Average Values |       |       |       |       |
| 10                                       | 20    | 40    | 80    | 10           | 20    | 40    | 80    | 10           | 20    | 40    | 80    | 10             | 20    | 40    | 80    |       |
| <b>Complex 1</b>                         | -29.6 | -39.0 | -42.0 | -59.1        | -29.6 | -41.2 | -45.7 | -58.2        | -45.6 | -46.2 | -52.4 | -86.5          | -35.0 | -42.2 | -46.7 | -67.9 |
| <b>ADR</b>                               | -14.2 | -6.4  | -18.3 | -19.5        | -2.7  | -9.1  | -9.5  | -14.5        | -15.3 | -20.6 | -21.5 | -21.6          | -10.7 | -12.0 | -16.4 | -18.6 |

| Human Ovarian Cancer Cell Line SK-OV-3   |       |       |       |              |       |       |       |              |       |       |       |                |       |       |       |       |
|------------------------------------------|-------|-------|-------|--------------|-------|-------|-------|--------------|-------|-------|-------|----------------|-------|-------|-------|-------|
| % Control Growth                         |       |       |       |              |       |       |       |              |       |       |       |                |       |       |       |       |
| Drug Concentrations ( $\mu\text{g/ml}$ ) |       |       |       |              |       |       |       |              |       |       |       |                |       |       |       |       |
| Experiment 1                             |       |       |       | Experiment 2 |       |       |       | Experiment 3 |       |       |       | Average Values |       |       |       |       |
| 10                                       | 20    | 40    | 80    | 10           | 20    | 40    | 80    | 10           | 20    | 40    | 80    | 10             | 20    | 40    | 80    |       |
| <b>Complex 1</b>                         | -71.4 | -82.5 | -83.9 | -84.8        | -68.8 | -78.8 | -82.2 | -84.6        | -64.2 | -78.2 | -85.5 | -85.6          | -68.1 | -79.8 | -83.9 | -85.0 |
| <b>ADR</b>                               | 20.9  | 13.0  | -14.1 | -17.7        | 8.5   | 8.2   | -22.0 | -28.2        | 11.7  | 6.8   | -22.2 | -25.3          | 13.7  | 9.3   | -19.5 | -23.7 |

| Human Cervix Cancer Cell Line HeLa       |      |      |       |              |       |       |       |              |       |       |       |                |       |       |       |       |
|------------------------------------------|------|------|-------|--------------|-------|-------|-------|--------------|-------|-------|-------|----------------|-------|-------|-------|-------|
| % Control Growth                         |      |      |       |              |       |       |       |              |       |       |       |                |       |       |       |       |
| Drug Concentrations ( $\mu\text{g/ml}$ ) |      |      |       |              |       |       |       |              |       |       |       |                |       |       |       |       |
| Experiment 1                             |      |      |       | Experiment 2 |       |       |       | Experiment 3 |       |       |       | Average Values |       |       |       |       |
| 10                                       | 20   | 40   | 80    | 10           | 20    | 40    | 80    | 10           | 20    | 40    | 80    | 10             | 20    | 40    | 80    |       |
| <b>Complex 1</b>                         | -0.3 | -5.0 | -21.4 | -29.6        | -52.4 | -62.1 | -74.1 | -76.9        | -47.3 | -57.2 | -72.1 | -81.0          | -33.4 | -41.4 | -55.9 | -62.5 |
| <b>ADR</b>                               | 1.3  | 1.3  | -7.1  | -11.2        | -75.7 | -78.8 | -80.0 | -81.2        | -71.3 | -76.2 | -78.6 | -79.0          | -48.6 | -51.2 | -55.2 | -57.2 |

| Human Breast Cancer Cell Line MCF7       |       |       |       |              |       |       |       |              |       |       |       |                |       |       |       |       |
|------------------------------------------|-------|-------|-------|--------------|-------|-------|-------|--------------|-------|-------|-------|----------------|-------|-------|-------|-------|
| % Control Growth                         |       |       |       |              |       |       |       |              |       |       |       |                |       |       |       |       |
| Drug Concentrations ( $\mu\text{g/ml}$ ) |       |       |       |              |       |       |       |              |       |       |       |                |       |       |       |       |
| Experiment 1                             |       |       |       | Experiment 2 |       |       |       | Experiment 3 |       |       |       | Average Values |       |       |       |       |
| 10                                       | 20    | 40    | 80    | 10           | 20    | 40    | 80    | 10           | 20    | 40    | 80    | 10             | 20    | 40    | 80    |       |
| <b>Complex 1</b>                         | -39.0 | -48.0 | -52.9 | -55.3        | -47.8 | -57.2 | -57.3 | -58.6        | -38.6 | -49.7 | -56.1 | -54.5          | -41.8 | -51.6 | -55.4 | -56.1 |
| <b>ADR</b>                               | -18.8 | -24.2 | -48.0 | -58.3        | -28.8 | -31.9 | -50.2 | -65.9        | -20.3 | -22.2 | -53.7 | -63.4          | -22.7 | -26.1 | -50.6 | -62.6 |
